# Supplementary material
Source: PubMed Central journal article supplement (PMC3406141)
Supplement: AEM.01139-12_zam999103562so1.pdf [file AEM.01139-12_zam999103562so1.pdf]

468 **Supplementary Information**

469

470 **Supplementary Materials and Methods**

471

472 **Microfluidic biofilm assays** Microfluidic devices were created out of  
473 poly(Dimethyl-siloxane) (PDMS) and glass by photolithography and replica molding  
474 as previously described (2). Master molds were fabricated by spinning KMPR 1025  
475 negative photoresist (MicroChem) onto clean silicon 4 inch wafers at 2500 rpm for  
476 30 sec, resulting in channels with an average height of 30  $\mu\text{m}$ . PDMS and crosslinker  
477 (Dow Corning; Sylgard 184) were mixed to a 10:1 m/m ratio, poured over the molds,  
478 and degassed in vacuum for 1 hour, followed by curing at 60°C for 6 hours. PDMS  
479 negatives were bonded to glass slides or 1.5 type coverslips (Fisher) by activating  
480 both with O<sub>2</sub> plasma using a Techniques MicroRIE plasma etcher. Plasma was  
481 generate at a pressure of 500 mTorr and RF power of 75 W for 10 seconds.

482         The device utilized for this study operates in two modes: (i) seeding of  
483 bacteria in a pattern to areas of known shear, and (ii) subsequent exposure of  
484 isolated populations of sessile bacteria to shear. All flow is achieved using a syringe  
485 pump (Harvard apparatus) and plastic syringes (Becton Dickenson), connected to  
486 devices using PEEK tubing (Upchurch Scientific) and luer lock stubs (Fisher).

487         Prior to seeding, channels were converted to a hydrophobic state utilizing a  
488 slight modification of our previously published method of *in situ* silane chemistry  
489 (1), using an octyl(tri-ethoxy)silane (OTES). After bonding PDMS and glass slides,  
490 devices were placed under vacuum for 1 hour to remove gas from the PDMS bulk.

491 During degassing, a 1%v/v OTES in 95:5 EtOH:H<sub>2</sub>O is made, and after addition of  
492 10% v/v Acetic Acid, the reaction is allowed to occur under vigorous shaking for 15  
493 min, protected from light. After the devices are brought out of the vacuum, a droplet  
494 of the OTES solution is added all inlets and outlets. The solution is drawn into the  
495 channels as air fills the PDMS, then OTES is injected into inlets (a), (b), and (c)  
496 (Figure 1A and Figure S2A) at a flow rate of 10  $\mu$ l/min for 35 min. The solution is  
497 allowed to react for a 10 more min without flow in the channels, followed by a wash  
498 with 600  $\mu$ l pure ethanol at 20  $\mu$ l/min into (a), (b), and (c), using a syringe pump to  
499 inject the fluid.

500 Bacteria were seeded in a specific pattern within the device by using a  
501 modification of the functionalization setup previously described (1). Devices were  
502 pre-equilibrated with phosphate buffered saline (PBS) pH 7.4, and inlets (a) and (c)  
503 (Figure 1A and Figure S2A) were injected at 10  $\mu$ l/min for 2 min with inlet (b)  
504 unplugged, followed by lowering the flow rate of inlets (a) and (c) to 500 nl/min,  
505 with inlet (b) unplugged, for at least 2 min. Next, while inlets (a) and (c) are flowing,  
506 inlet (b) was plugged in with the bacteria solution, consisting of overnight culture at  
507 OD<sub>600</sub> = 0.6, washed 3 times in PBS and diluted 1:10 in PBS. Subsequently, inlets (a)  
508 and (c) were flowed at 500 nl/min, and inlet (b) was flowed at 125 nl/min for 1  
509 hour to seed bacteria. After seeding, inlet 2 was stopped, and inlets 1 and 3 were  
510 flowed for 5 min at 500 nl/min, and finally inlet (b) was unplugged. After seeding,  
511 conversion to perfusion mode was achieved by changing inlet (c) to an outlet, and  
512 blocking inlet (b) and outlet (d) (Figure 1 C, Figure S2 B). Channel blocking was  
513 achieved using a Syringe leur stub (Fisher) filled with cured PDMS and crosslinker.

514 Perfusion was carried out in a 37°C incubator, flowing TSB with 2.5% glucose at 18  
515 µl/min for high flow rate devices, and 4.5 µl/min for low flow rates.

516 After perfusion for 6, 12, or 24 hours, biofilms in the microfluidic assay were  
517 first washed at 4°C with PBS at 18 µl/min or 4.5 µl/min for 20 min and fixed by  
518 flowing through 400 µl of 4% paraformaldehyde at the respective flow rate used for  
519 culture. The devices were incubated at 4°C for 12 hours, and then washed with 400  
520 µl of PBS at 10 µl/min.

521

## 522 References

- 523 1. **Weaver W. M., S. Dharmaraja, V. Milisavljevic, and D. Di Carlo.** 2011. The  
524 effects of shear stress on isolated receptor-ligand interactions of *Staphylococcus*  
525 *epidermidis* and human plasma fibrinogen using molecularly patterned  
526 microfluidics. *Lab Chip* **11**:883–889.
- 527 2. **Xia Y., and G. M. Whitesides.** 1998. Soft Lithography. *Annual Review of*  
528 *Materials Science* **28**:153–184.

529

530

531

532 **Supplementary Figures**

533

534 **Supplementary Figure 1:** Determining the operational shear stresses present in  
535 catheter lumens. (A) Cross sectional surface plots of the velocity fields in single and  
536 double lumen catheters created in COMSOL Multiphysics. Dimensions were taken  
537 from measurement of Argyle and BD catheters. (B) Extraction of the cross-sectional  
538 velocity profile from A, illustrating how the wall shear stresses were calculated in  
539 each scenario. (C) Plots of the wall shear stresses in both single and double lumen  
540 catheters as a function of radial wall position. X-axis markers correspond to the  
541 markers on the double lumen catheter in A. Maximum shear occurs on the rounded  
542 face, where as shear stress minimum occurs in the corners. (D) A comprehensive  
543 plot illustrating the calculated operational ranges of various catheter sizes and types.

544

545 **Supplementary Figure 2:** Operational and initial conditions in the microfluidic  
546 biofilm assay. (A) DAPI stained cells just after seeding, prior to exposure to fluid  
547 shear. (B) The sizes of the patterns differ between chambers, chamber 1 having the  
548 largest pattern and chamber 4 having the smallest. (C) Despite differences in size,  
549 there is no significant difference in the surface density of the cells within the  
550 patterns between each chamber. (D) Using low volume percentages of 1  $\mu\text{m}$   
551 fluorescent beads ( $\sim 0.00005\%$ ), streak images of beads in flow were used to  
552 measure the average fluid velocity within the chambers. Dot plots show the velocity  
553 for each bead measured, and the black bars represent average velocities. Red Bars  
554 show the theoretical average fluid velocities calculated from fluidic resistances of

555 the channels and injected flow rates, assuming ideal fluidic resistance theory. Black  
556 numbers give the average velocity calculated for each chamber. (E) Average  
557 velocities measured in the resistor channels between the four chambers, where ( $R_{i-}$   
558  $_{(i+1)}$ ) indicates flow between the  $i$ th and  $i+1$  chambers. Average velocities are  
559 written above each dot plot in black.

560

561 **Supplementary Figure 3:** (A-B) Microtiter plate assays verified that the strains  
562 used in this study represent the three main biofilm phenotypes. (A) Strains 35984  
563 and A-26 form biofilms under normal culture conditions, where as 12228 and A-10  
564 form no biofilms under any culture conditions. (B) Strains A-5, W-166, and Z-173  
565 are induced to form biofilms upon supplementation of media with increasing  
566 concentrations of ethanol. These results agree with those obtained by Milisavljevic  
567 et al. Measurements are presented as fold increase relative to control wells with no  
568 seeded bacteria. (D-E) Both W-166 and Z-173 are induced to produce biofilms  
569 when exposed to fluid flow. Both strains form biofilms after 12 hours and show no  
570 significant increase in biofilm after 24 hours compared to 12 hours, indicating  
571 biofilm formation sooner than A-5 (shown in Figure 3B). (§ :  $P < 0.025$ , \*\* :  $P < 0.01$ ,  
572 all measured against 1)

573

574 **Supplementary Figure 4:** A-5 clones collected from the microfluidic biofilm assay  
575 revert to the original phenotype in microtiter plate assay. (A) A flow chart  
576 illustrating the process of excising the biofilms from the microfluidic chip. The  
577 Phase image indicates that there is biofilm in the chamber before excision. (B)

578 Streaks of clones from Chambers 3 and 4 from the 18  $\mu$ l/min device (HQ1) and also  
579 a control device where no bacteria were seeded (HQ3 ,-Bact) to show that colonies  
580 picked from HQ1 and HQ2 were in fact from the channels, and not contaminants.  
581 (C) Representative images of microtiter plate assays for all six clones assayed from  
582 HQ1 and HQ2, as well as the A-5 input. (D) Quantitation of the microtiter plate  
583 assays using fold increase in absorbance at 570 nm measured against a well in  
584 which no bacteria were seeded.
