# Supplementary material
Source: PubMed Central journal article supplement (PMC3406141)

**Figure S1**

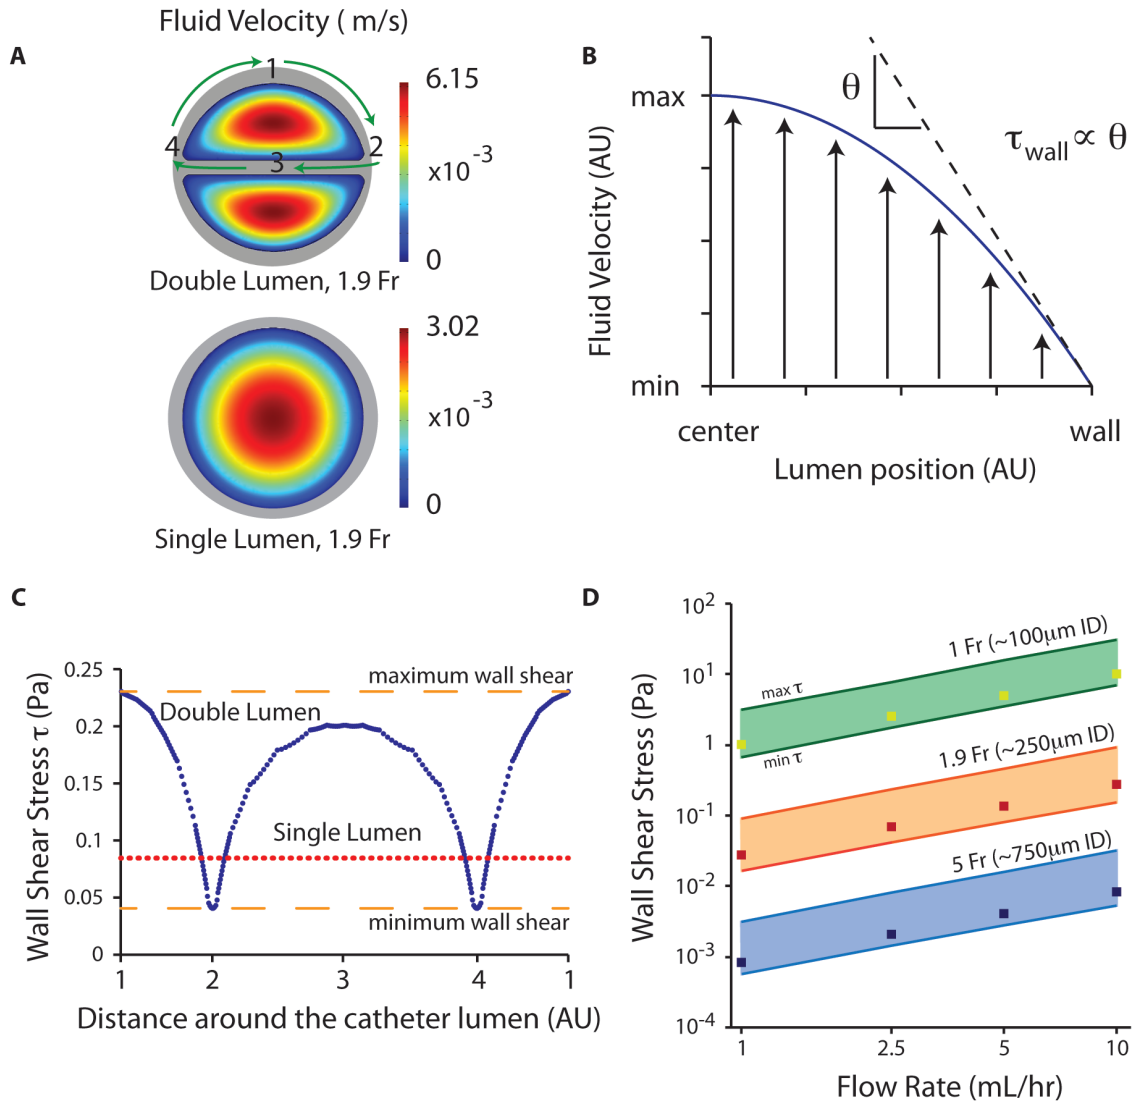

Supplement: AEM.01139-12_zam999103562so2.pdf [file AEM.01139-12_zam999103562so2.pdf]

**Figure S2**

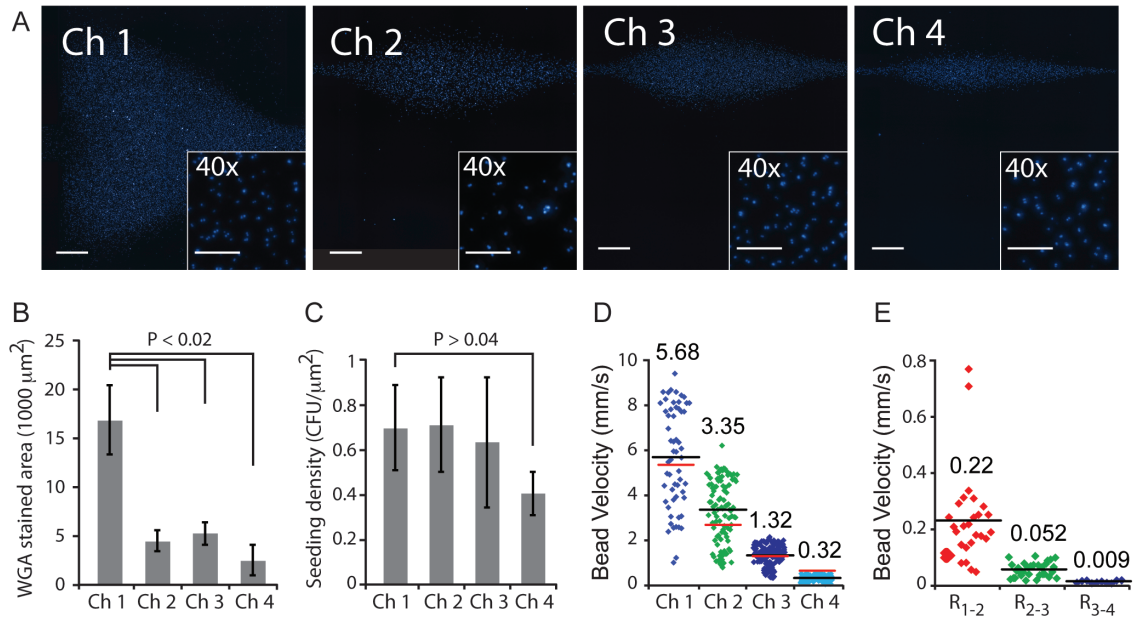

Supplement: AEM.01139-12_zam999103562so3.pdf [file AEM.01139-12_zam999103562so3.pdf]

**Figure S3**

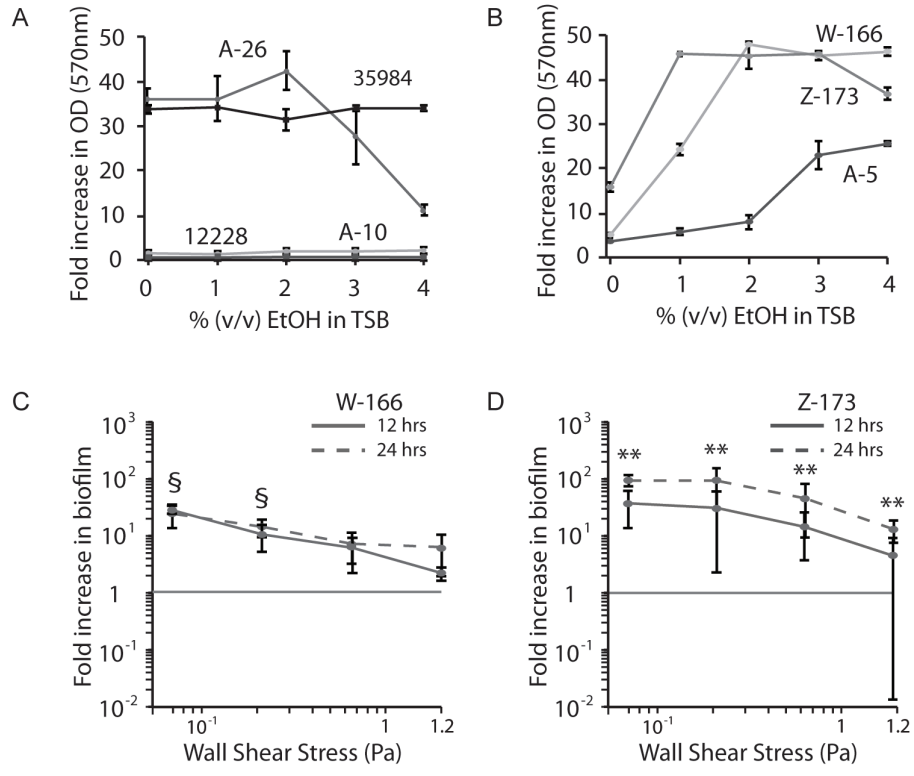

Supplement: AEM.01139-12_zam999103562so4.pdf [file AEM.01139-12_zam999103562so4.pdf]

**Figure S4**

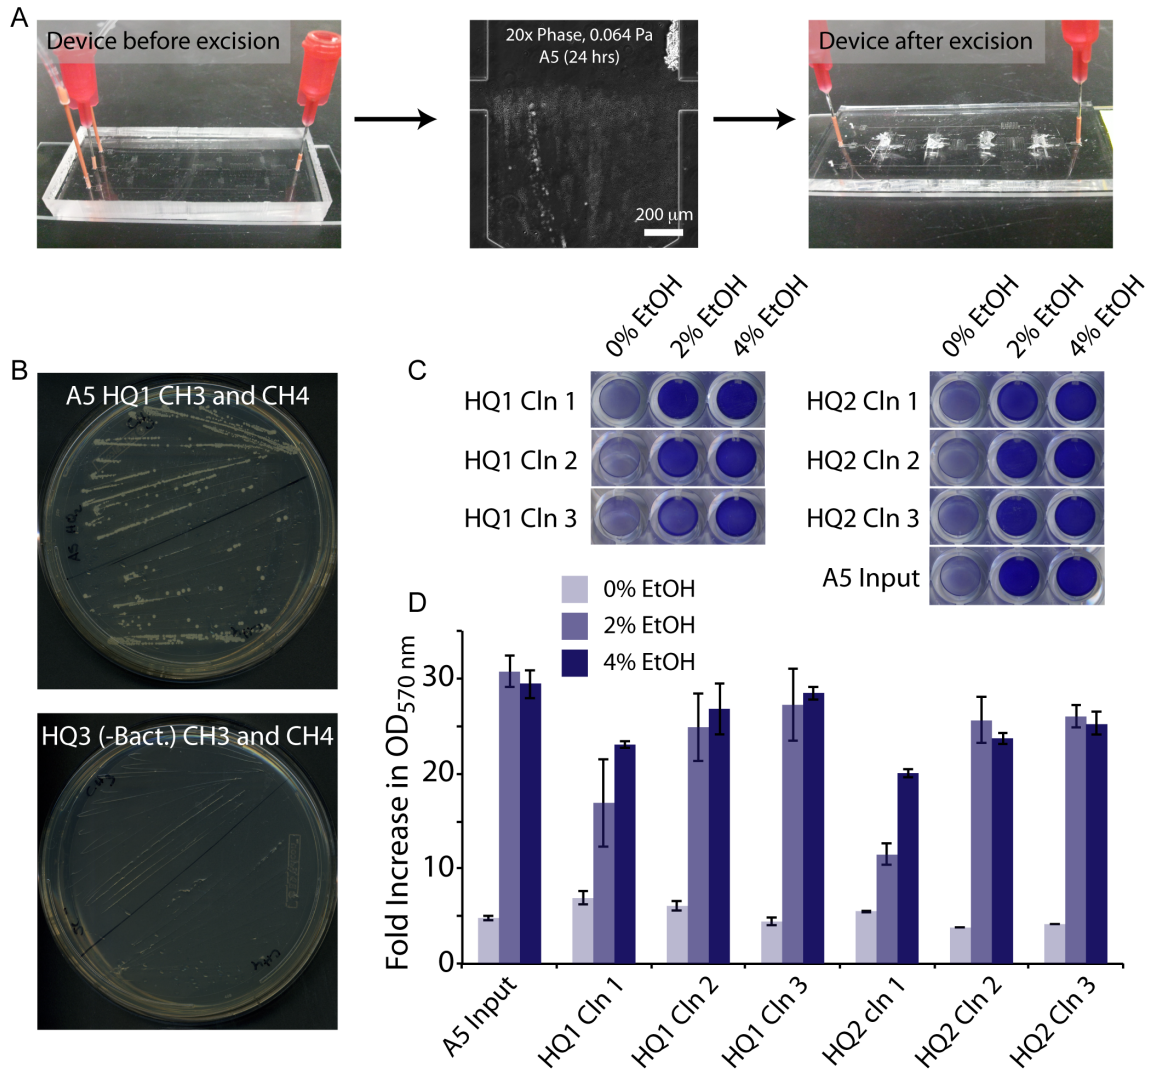

Supplement: AEM.01139-12_zam999103562so5.pdf [file AEM.01139-12_zam999103562so5.pdf]
